# Supplementary material for: Transcriptional Profiling of Mouse Uterus at Pre-Implantation Stage under VEGF Repression
Source: PLoS One. 2013 Feb 28;8(2):e57287. doi: 10.1371/journal.pone.0057287 (PMC3585347; doi:10.1371/journal.pone.0057287)
Supplement: Table S3 — Down-regulated genes by VEGF repression at G2.5. The most highly expressed and VEGF-regulated genes with fold change ≥5.0. (XLS) [file pone.0057287.s011.xls]

## Sheet: Sheet1
Gene Symbol	Description	Fold change	Expression level
Lrp2	low density lipoprotein receptor-related protein 2	10000	534
Angptl7	angiopoietin-like 7	58.824	569
Sult1d1	sulfotransferase family 1D, member 1	38.462	1362
Npl	N-acetylneuraminate pyruvate lyase	37.037	451
Jam2	junction adhesion molecule 2	30.303	1039
Ctla2a	cytotoxic T lymphocyte-associated protein 2 alpha	24.39	30830
Lef1	lymphoid enhancer binding factor 1	22.727	219
Ndp	Norrie disease (pseudoglioma)	18.868	285
Maob	monoamine oxidase B	17.544	937
Ihh	Indian hedgehog	16.949	683
Fxyd4	FXYD domain-containing ion transport regulator 4	16.949	1588
Fst	follistatin	16.129	769
Hdc	histidine decarboxylase	13.889	2065
Mt2	metallothionein 2	12.048	8828
Hmgcs2	3-hydroxy-3-methylglutaryl-Coenzyme A synthase 2	11.628	257
Hoxa11as	HOXA11 antisense RNA	11.363	2030
Pkdcc	protein kinase domain containing, cytoplasmic	10.638	2466
Cldn1	claudin 1	10	369
Tcf23	transcription factor 23	9.524	1290
Calb1	calbindin 1	9.346	1937
Galm	galactose mutarotase	8.475	930
F2r	coagulation factor II (thrombin) receptor	8.333	793
Vgll3	vestigial like 3	8.265	237
Vit	vitrin	8.265	397
Sult1a1	sulfotransferase family 1A, phenol-preferring, member 1	7.752	537
Pcx	pyruvate carboxylase	7692	1081
Cdo1	cysteine dioxygenase 1, cytosolic	7634	739
Gm13889	predicted gene 13889	7519	469
Hopx	HOP homeobox	7.463	208
Gm106	predicted gene 106	7.353	248
Arl4d	ADP-ribosylation factor-like 4D	6.897	218
Hand2	heart and neural crest derivatives expressed transcript 2	6.711	1128
Tnfrsf21	tumor necrosis factor receptor superfamily, member 21	6.579	767
Ramp1	receptor (calcitonin) activity modifying protein 1	6.41	939
Slc6a2	solute carrier family 6 , member 2	6.329	299
Sgk1	serum/glucocorticoid regulated kinase 1	6.25	1385
Nptx2	neuronal pentraxin 2	5.814	453
Gstm1	glutathione S-transferase, mu 1	5.714	4069
Slc2a3	solute carrier family 2 , member 3	5.682	708
Pllp	plasma membrane proteolipid	5.556	442
Mme	membrane metallo endopeptidase	5.525	473
Tmem158	transmembrane protein 158	5.495	1300
Arl3	ADP-ribosylation factor-like 3	5.405	366
Ano1	anoctamin 1, calcium activated chloride channel	5.405	705
Hmgn3	high mobility group nucleosomal binding domain 3	5.376	645
Gstm7	glutathione S-transferase, mu 7	5.319	4729
Usp2	ubiquitin specific peptidase 2	5.263	378
Penk	preproenkephalin	5.102	404
Rgs2	regulator of G-protein signaling 2	5.076	1743
